# Supplementary material for: Translation, Cross-Cultural Adaptation and Validation of the Lymphedema Quality of Life Questionnaire (LYMQOL) in German-Speaking Patients with Lymphedema of the Lower Limbs
Source: MDPI journal article supplement (doi:10.3390/healthcare12030409), 2024-02-05

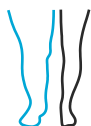

# LYMQOL Bein

Sehr geehrte Patient\*innen,  
 der vorliegende Fragebogen dient der Erfassung des Einflusses des bei Ihnen bestehenden Lymphödems auf Ihre Lebensqualität. Bitte beziehen Sie dabei alle Fragen auf die Schwellung selbst, die notwendigen Behandlungen (bspw. manuelle Lymphdrainage, Kompressionskleidung) sowie eventuell auftretende Komplikationen (bspw. Erysipel/Wundrose). Vielen Dank!

Alternativ: Patient\*innenetikett

Name: .....

Geburtsdatum: .....

Datum: .....

|                                                                                                                     |                                                                                                               | gar nicht<br>(1)         | etwas<br>(2)             | recht stark<br>(3)       | sehr stark<br>(4)        | n. z.<br>nicht zu-<br>treffend |
|---------------------------------------------------------------------------------------------------------------------|---------------------------------------------------------------------------------------------------------------|--------------------------|--------------------------|--------------------------|--------------------------|--------------------------------|
| 1. Als wie stark empfinden Sie die Schwellung des linken Beines?                                                    |                                                                                                               | <input type="checkbox"/>       |
| 2. Als wie stark empfinden Sie die Schwellung des rechten Beines?                                                   |                                                                                                               | <input type="checkbox"/>       |
| FUNKTION                                                                                                            | 3. Wie stark beeinträchtigen das geschwollene Bein und seine Behandlung Sie bei folgenden Alltagsaktivitäten? |                          |                          |                          |                          |                                |
|                                                                                                                     | a. Gehen                                                                                                      | <input type="checkbox"/>       |
|                                                                                                                     | b. Vornüberbeugen, z.B. beim Schuhe anziehen oder der Fußpflege                                               | <input type="checkbox"/>       |
|                                                                                                                     | c. Stehen                                                                                                     | <input type="checkbox"/>       |
|                                                                                                                     | d. Aus dem Sitzen aufstehen                                                                                   | <input type="checkbox"/>       |
|                                                                                                                     | e. Im Beruf                                                                                                   | <input type="checkbox"/>       |
|                                                                                                                     | f. Bei der Hausarbeit                                                                                         | <input type="checkbox"/>       |
| 4. Wie stark sind Ihre Freizeitaktivitäten / Ihr Sozialleben dadurch beeinträchtigt?<br>Bitte nennen Sie Beispiele: |                                                                                                               | <input type="checkbox"/>       |
| 5. Wie sehr sind Sie auf Hilfe angewiesen?                                                                          |                                                                                                               | <input type="checkbox"/>       |
| KÖRPERBILD                                                                                                          | 6. Wie sehr denken Sie, verändert die Schwellung Ihr Aussehen?                                                | <input type="checkbox"/>       |
|                                                                                                                     | 7. Wie schwierig ist es, Kleidung zu finden, die Ihnen passt?                                                 | <input type="checkbox"/>       |
|                                                                                                                     | 8. Wie schwierig ist es, Kleidung zu finden, die Sie gerne tragen?                                            | <input type="checkbox"/>       |
|                                                                                                                     | 9. Wie schwierig ist es, passende Schuhe zu finden?                                                           | <input type="checkbox"/>       |
|                                                                                                                     | 10. Wie schwierig ist es, passende Socken / Strümpfe / Strumpfhosen zu finden?                                | <input type="checkbox"/>       |
|                                                                                                                     | 11. Beeinflusst die Schwellung Ihr Selbstbild?                                                                | <input type="checkbox"/>       |
|                                                                                                                     | 12. Beeinflusst die Schwellung Ihre Partnerschaft?                                                            | <input type="checkbox"/>       |
|                                                                                                                     | 13. Beeinflusst die Schwellung Ihre Beziehungen zu anderen Menschen?                                          | <input type="checkbox"/>       |

Fragebogen zur Erfassung der Lebensqualität bei Lymphödem des Beines  
LYMQOL Bein

|                                                                                                                                                                                                                                                                                                                                                                                                                                                                                                                                                                                                                                                                                                                                                                                                                                                                                                                                                                                                                                                                                                                                                                                                                    |                                                                            | gar nicht<br>(1)         | etwas<br>(2)             | recht stark<br>(3)       | sehr stark<br>(4)        | n. z.<br>nicht zu-<br>treffend |
|--------------------------------------------------------------------------------------------------------------------------------------------------------------------------------------------------------------------------------------------------------------------------------------------------------------------------------------------------------------------------------------------------------------------------------------------------------------------------------------------------------------------------------------------------------------------------------------------------------------------------------------------------------------------------------------------------------------------------------------------------------------------------------------------------------------------------------------------------------------------------------------------------------------------------------------------------------------------------------------------------------------------------------------------------------------------------------------------------------------------------------------------------------------------------------------------------------------------|----------------------------------------------------------------------------|--------------------------|--------------------------|--------------------------|--------------------------|--------------------------------|
| <b>SYMPTOME</b>                                                                                                                                                                                                                                                                                                                                                                                                                                                                                                                                                                                                                                                                                                                                                                                                                                                                                                                                                                                                                                                                                                                                                                                                    | 14. Haben Sie Schmerzen durch das Lymphödem?                               | <input type="checkbox"/>       |
|                                                                                                                                                                                                                                                                                                                                                                                                                                                                                                                                                                                                                                                                                                                                                                                                                                                                                                                                                                                                                                                                                                                                                                                                                    | 15. Verspüren Sie ein Taubheitsgefühl im geschwollenen Bein?               | <input type="checkbox"/>       |
|                                                                                                                                                                                                                                                                                                                                                                                                                                                                                                                                                                                                                                                                                                                                                                                                                                                                                                                                                                                                                                                                                                                                                                                                                    | 16. Verspüren Sie ein Kribbeln oder „Ameisenlaufen“ im geschwollenen Bein? | <input type="checkbox"/>       |
|                                                                                                                                                                                                                                                                                                                                                                                                                                                                                                                                                                                                                                                                                                                                                                                                                                                                                                                                                                                                                                                                                                                                                                                                                    | 17. Fühlt sich das geschwollene Bein schwach an?                           | <input type="checkbox"/>       |
|                                                                                                                                                                                                                                                                                                                                                                                                                                                                                                                                                                                                                                                                                                                                                                                                                                                                                                                                                                                                                                                                                                                                                                                                                    | 18. Fühlt sich das geschwollene Bein schwer an?                            | <input type="checkbox"/>       |
|                                                                                                                                                                                                                                                                                                                                                                                                                                                                                                                                                                                                                                                                                                                                                                                                                                                                                                                                                                                                                                                                                                                                                                                                                    | 19. Fühlen Sie sich müde oder erschöpft?                                   | <input type="checkbox"/>       |
| <b>STIMMUNG</b>                                                                                                                                                                                                                                                                                                                                                                                                                                                                                                                                                                                                                                                                                                                                                                                                                                                                                                                                                                                                                                                                                                                                                                                                    | Hatten Sie in der vergangenen Woche...                                     |                          |                          |                          |                          |                                |
|                                                                                                                                                                                                                                                                                                                                                                                                                                                                                                                                                                                                                                                                                                                                                                                                                                                                                                                                                                                                                                                                                                                                                                                                                    | 20. Probleme mit Schlaf?                                                   | <input type="checkbox"/>       |
|                                                                                                                                                                                                                                                                                                                                                                                                                                                                                                                                                                                                                                                                                                                                                                                                                                                                                                                                                                                                                                                                                                                                                                                                                    | 21. Konzentrationsschwierigkeiten, z.B. beim Lesen?                        | <input type="checkbox"/>       |
|                                                                                                                                                                                                                                                                                                                                                                                                                                                                                                                                                                                                                                                                                                                                                                                                                                                                                                                                                                                                                                                                                                                                                                                                                    | 22. Gefühle der Anspannung?                                                | <input type="checkbox"/>       |
|                                                                                                                                                                                                                                                                                                                                                                                                                                                                                                                                                                                                                                                                                                                                                                                                                                                                                                                                                                                                                                                                                                                                                                                                                    | 23. Sorgen?                                                                | <input type="checkbox"/>       |
|                                                                                                                                                                                                                                                                                                                                                                                                                                                                                                                                                                                                                                                                                                                                                                                                                                                                                                                                                                                                                                                                                                                                                                                                                    | 24. Erhöhte Reizbarkeit?                                                   | <input type="checkbox"/>       |
|                                                                                                                                                                                                                                                                                                                                                                                                                                                                                                                                                                                                                                                                                                                                                                                                                                                                                                                                                                                                                                                                                                                                                                                                                    | 25. Niedergeschlagenheit?                                                  | <input type="checkbox"/>       |
| <b>26. Wie würden Sie Ihre Lebensqualität derzeit insgesamt bewerten?</b><br>Bitte vergeben Sie einen Punktwert auf der folgenden Skala:<br><div style="display: flex; justify-content: space-around; align-items: center;"> <div style="text-align: center;"><input type="checkbox"/><br/>0</div> <div style="text-align: center;"><input type="checkbox"/><br/>1</div> <div style="text-align: center;"><input type="checkbox"/><br/>2</div> <div style="text-align: center;"><input type="checkbox"/><br/>3</div> <div style="text-align: center;"><input type="checkbox"/><br/>4</div> <div style="text-align: center;"><input type="checkbox"/><br/>5</div> <div style="text-align: center;"><input type="checkbox"/><br/>6</div> <div style="text-align: center;"><input type="checkbox"/><br/>7</div> <div style="text-align: center;"><input type="checkbox"/><br/>8</div> <div style="text-align: center;"><input type="checkbox"/><br/>9</div> <div style="text-align: center;"><input type="checkbox"/><br/>10</div> </div> <div style="display: flex; justify-content: space-between; margin-top: 5px;"> <span>schlecht</span> <span style="font-size: 2em;">→</span> <span>hervorragend</span> </div> |                                                                            |                          |                          |                          |                          |                                |

Vielen Dank für Ihre Teilnahme!

Der vorliegende Fragebogen ist eine adaptierte Übersetzung des englischen LYMQOL Leg, welcher von Prof. Vaughan Keeley und Kollegen etabliert wurde (Keeley V, Crooks S, Locke J, et al. A quality of life measure for limb lymphoedema (LYMQOL). Journal of Lymphoedema 2010; pp. 26–37). Die Methodik zu Übersetzung, Adaptation und Validierung wurde veröffentlicht unter Nuwayhid R et al.: Translation, Cross-Cultural Adaptation and Validation of the Lymphedema Quality of Life Questionnaire (LYMQOL) in German-Speaking Patients with Lymphedema of the Lower Limbs. Healthcare. 2024; 12(3):409. <https://doi.org/10.3390/healthcare12030409>

Bei Fragen oder Anmerkungen zu diesem Fragebogen wenden Sie sich bitte an:

Dr. med. Rima Nuwayhid  
Klinik für Orthopädie, Unfallchirurgie und Plastische Chirurgie  
Universitätsklinikum Leipzig AöR  
Liebigstraße 20  
04103 Leipzig

**Für die Untersuchenden: Auswertung**

Pro Domäne werden die den Antworten zugeordneten Zahlenwerte addiert und durch die Anzahl der Fragen pro Domäne dividiert (Funktion ÷ 8, Körperbild ÷ 8, Symptome ÷ 6, Stimmung ÷ 6). Hierdurch ergeben sich Werte von 0 bis 4, wobei höhere Werte eine stärkere Einschränkung der Lebensqualität widerspiegeln. Sind die Hälfte oder mehr Fragen einer Domäne nicht beantwortet oder als nicht zutreffend gekennzeichnet, kann diese Domäne nicht ausgewertet werden.

|                 | Funktion (÷ 8) | Körperbild (÷ 8) | Symptome (÷ 6) | Stimmung (÷ 6) |
|-----------------|----------------|------------------|----------------|----------------|
| <b>ERGEBNIS</b> |                |                  |                |                |

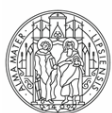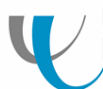

Supplement: s1 [file s1]
